# Supplementary material for: Grafting of Cyclodextrin to Theranostic Nanoparticles Improves Blood-Brain Barrier Model Crossing
Source: MDPI journal article supplement (doi:10.3390/biom13030573), 2023-03-22
Supplement: s1 [file s1]

# Grafting of Cyclodextrin to Theranostic Nanoparticles Improve Blood-Brain Barrier Model Crossing

Antonino Puglisi <sup>1,\*</sup>, Noemi Bognanni <sup>1,2</sup>, Graziella Vecchio <sup>2</sup>, Ece Bayir <sup>3</sup>, Peter van Oostrum <sup>1</sup>, Dawn Shepherd <sup>4</sup>, Frances Platt <sup>4</sup> and Erik Reimhult <sup>1</sup>

<sup>1</sup> Department of Bionanosciences, Institute of Biologically Inspired Materials, University of Natural Resources and Life Sciences (BOKU), 1190 Vienna, Austria

<sup>2</sup> Dipartimento di Scienze Chimiche, Università degli Studi di Catania, 95125 Catania, Italy

<sup>3</sup> Central Research Testing and Analysis Laboratory Research and Application Center, Ege University Bornova, Izmir 35100, Turkey

<sup>4</sup> Department of Pharmacology, University of Oxford, Oxford OX1 3QT, UK

\* Correspondence: antonino.puglisi@boku.ac.at

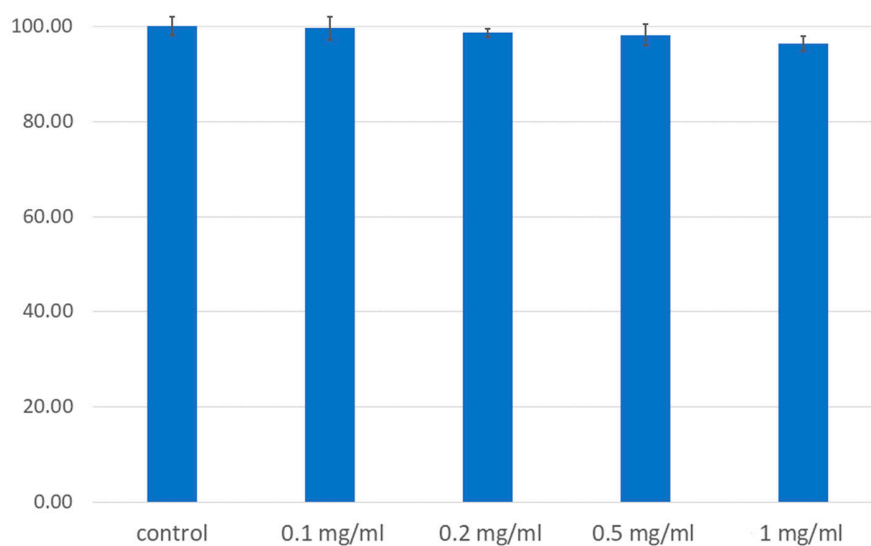

**Figure S1**-Resazurin viability assay on *Npc1*-deficient CHO cells after 24 h incubation with different high concentrations of CySPION and 48 h regeneration compared to a control, showing no significant cytotoxicity.

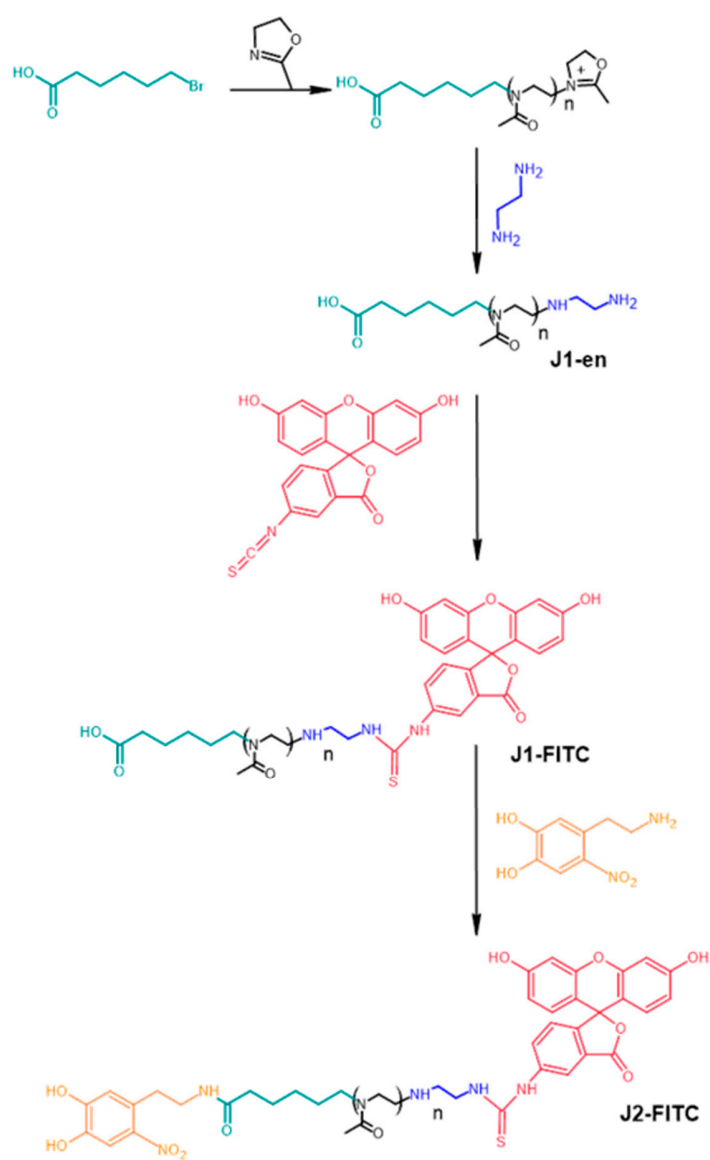

**Figure S2-**General scheme of synthesis of the fluorescein-labelled polymer

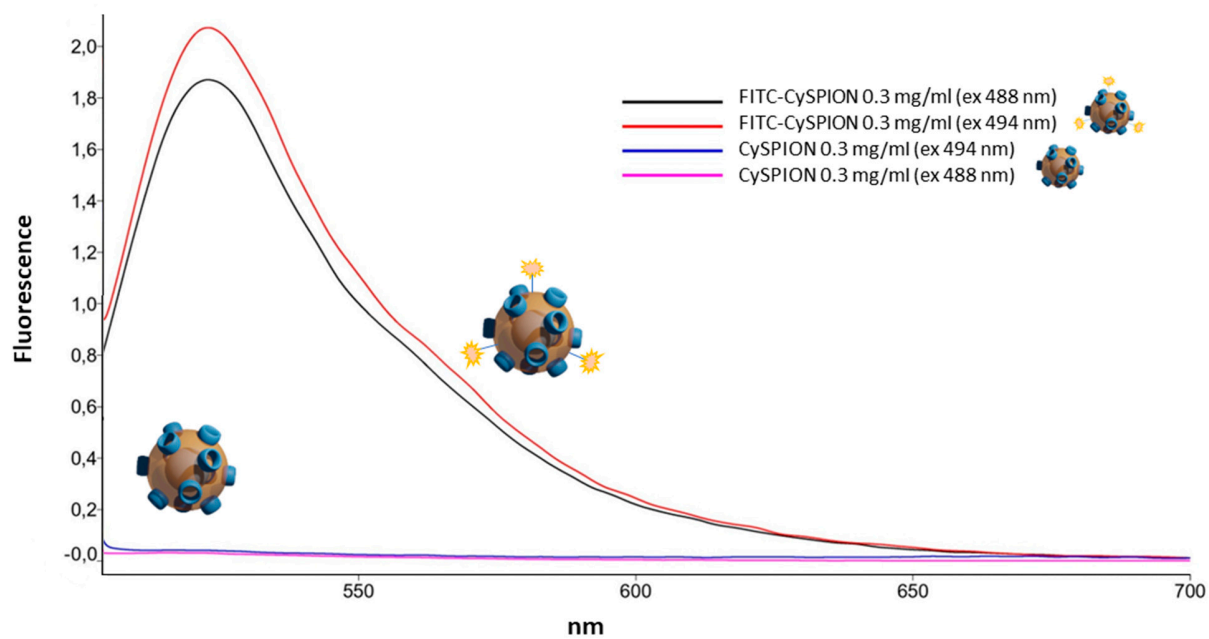

Figure S3 Fluorescence of CySPION and FITC- CySPION at 488 nm and 494 nm

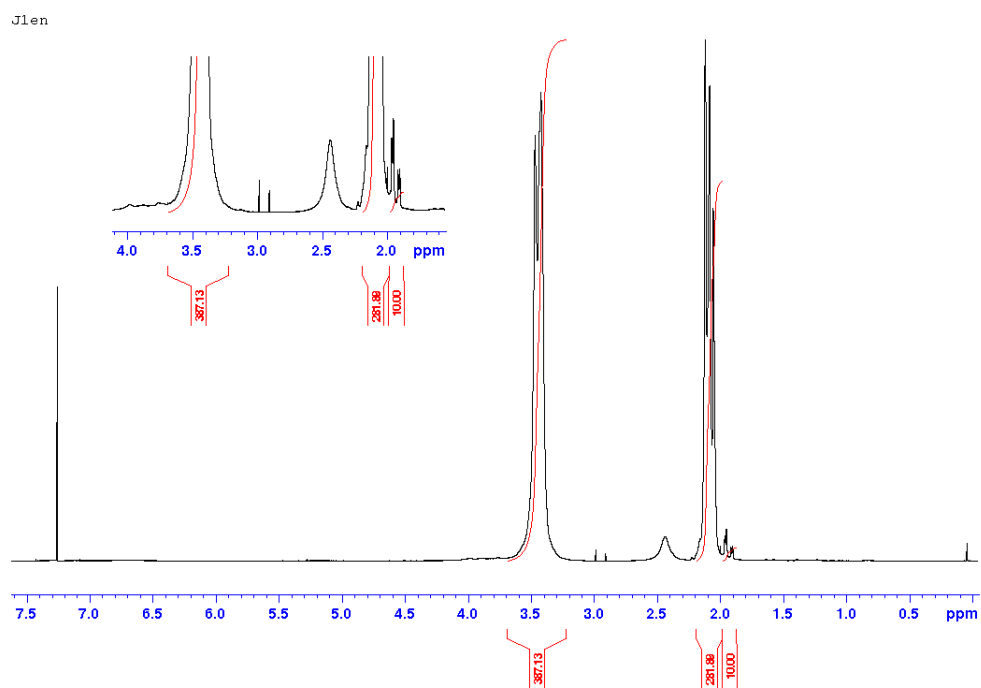

Figure S4 -  $^1\text{H}$  NMR (300 MHz) of J1-en in  $\text{CDCl}_3$

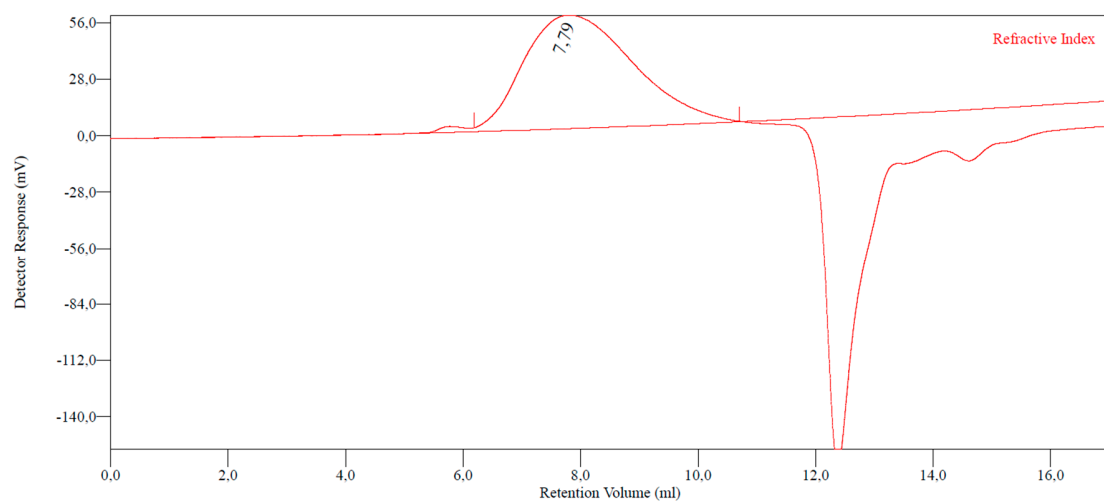

Figure S5 - GPC of J1-en

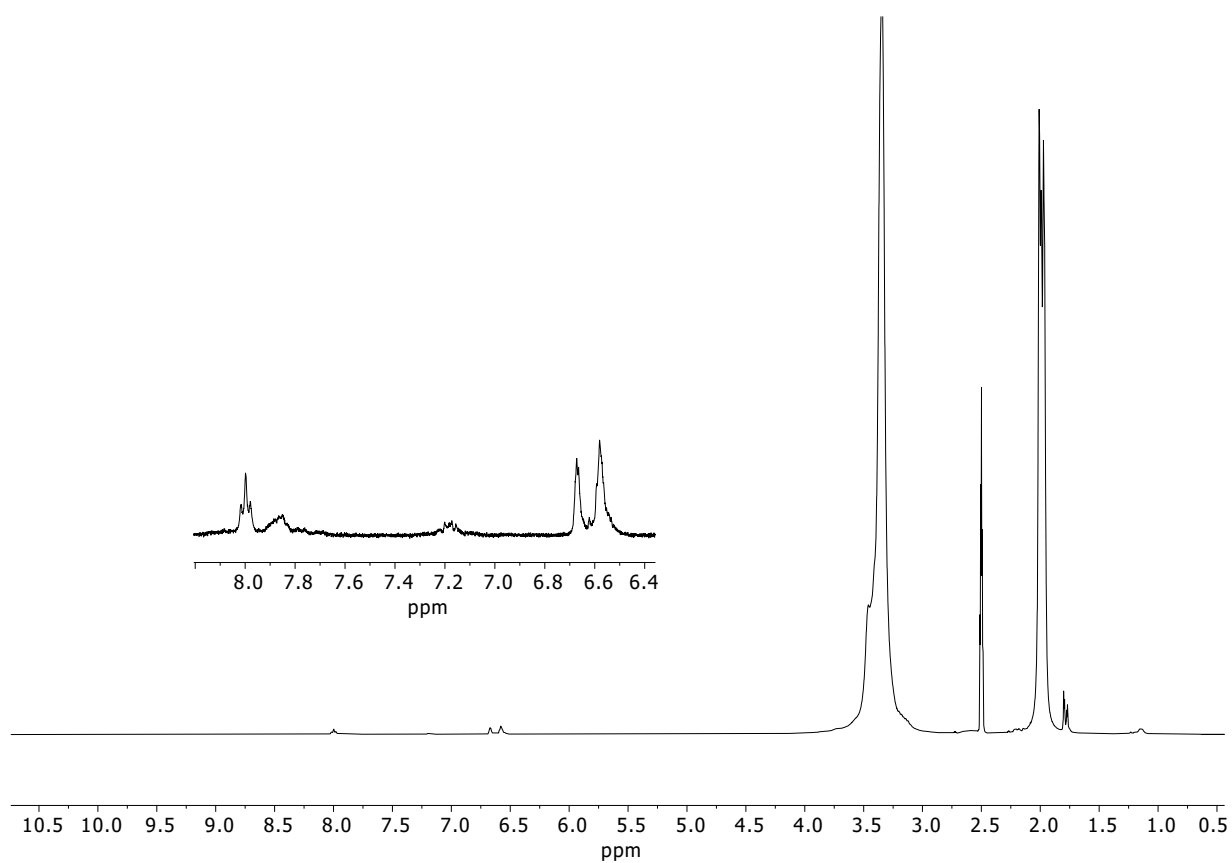

Figure S6 -  $^1\text{H}$ NMR (300 MHz) of J1-FITC in DMSO

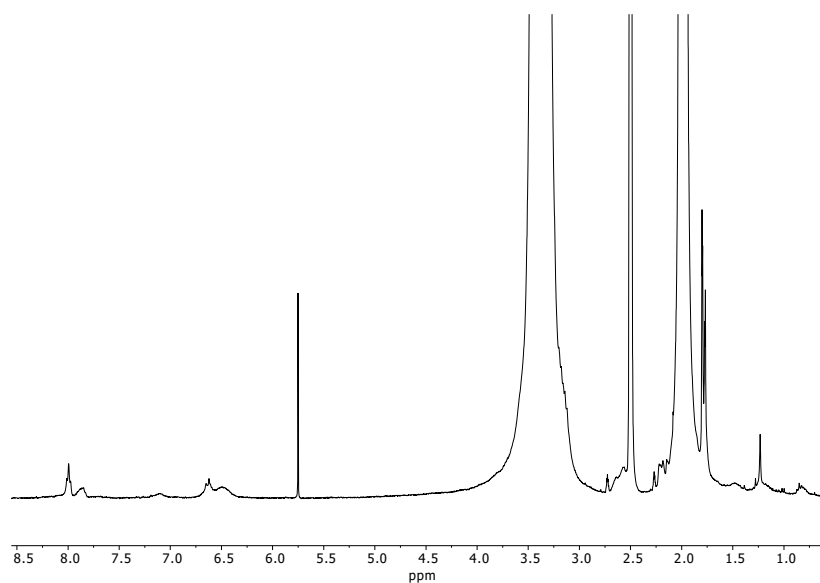

Figure S7 -  $^1\text{H}$ NMR (300 MHz) of FITC-PMOXA in DMSO

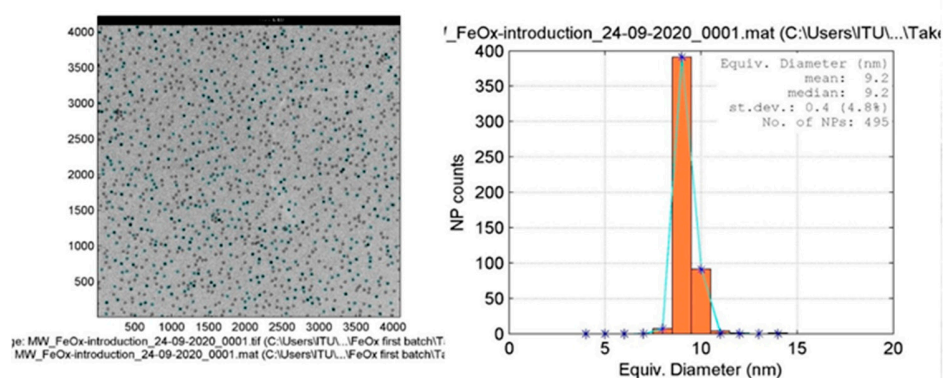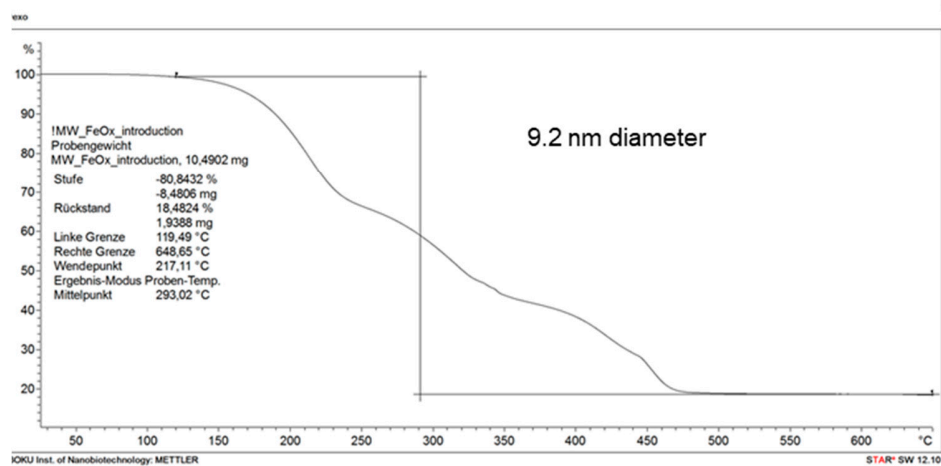

Figure S8 - TEM and TGA of oleic acid-coated SPIONs obtained via heat-up method

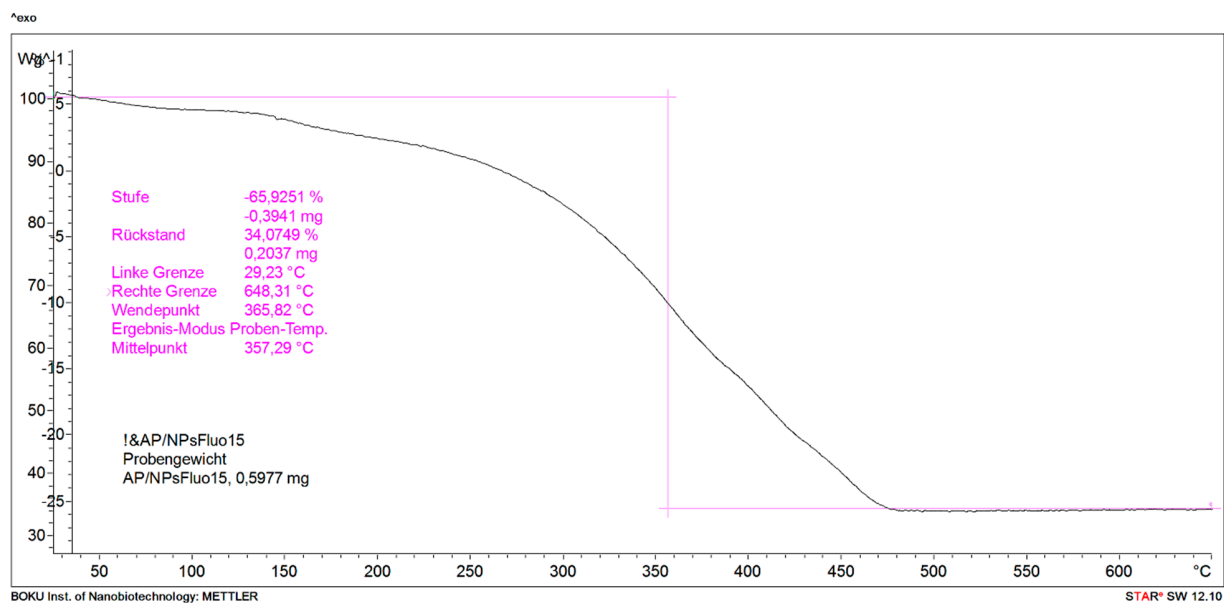

Figure S9 - TGA CySPIONs doped with 15% fluorescein-labelled polymer

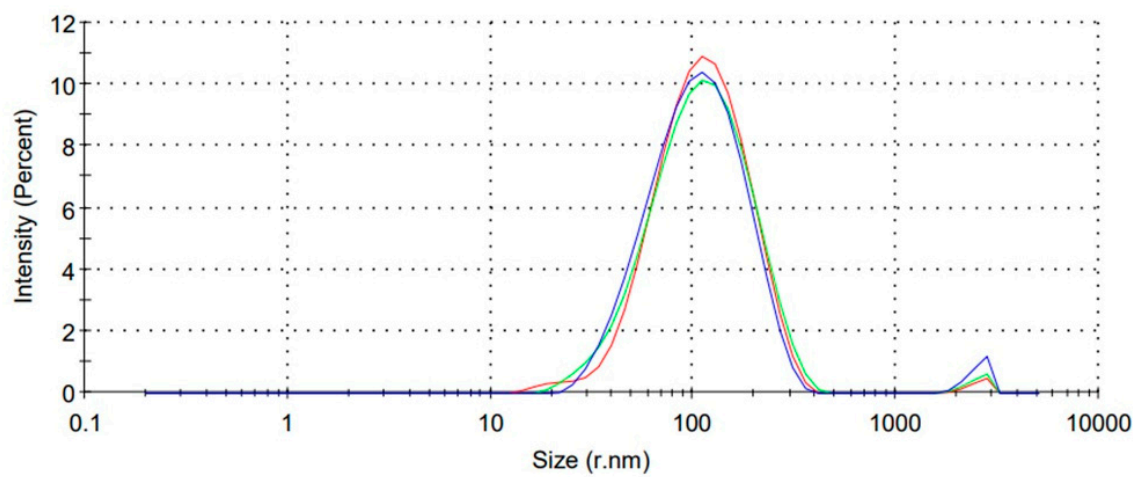

Figure S10 - Size distribution by intensity for FITC-CySPION. Radius is 120 nm

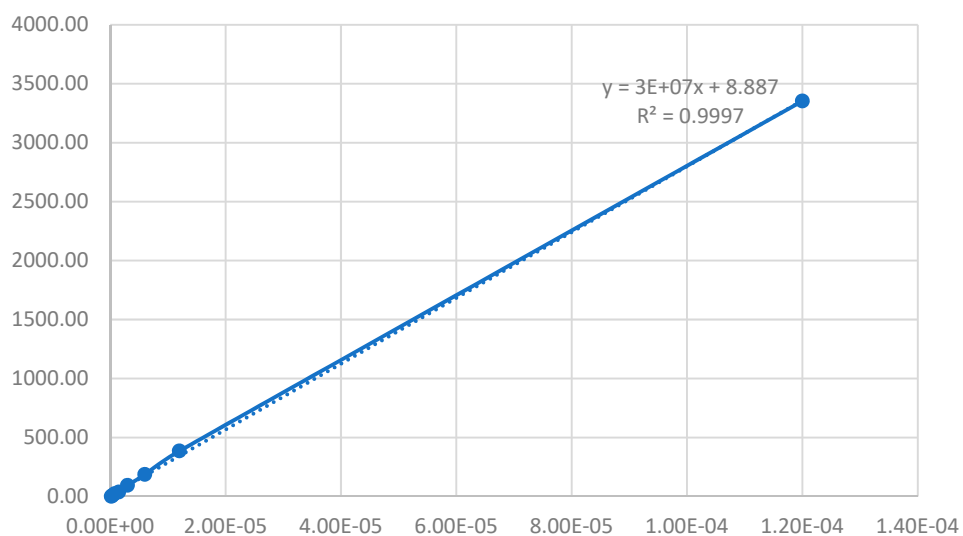

**Figure S11** - Calibration curve of LY

**Table S1** - Calibration curve of LY at 530nm

|   | Concentration<br>(M) | Fluorescence<br>(530nm) |
|---|----------------------|-------------------------|
| 1 | 1.20E-04             | 3353.10                 |
| 2 | 1.20E-05             | 385.40                  |
| 3 | 6.00E-06             | 186.40                  |
| 4 | 3.00E-06             | 93.00                   |
| 5 | 1.50E-06             | 37.10                   |
| 6 | 7.50E-07             | 22.20                   |
| 7 | 3.75E-07             | 7.00                    |
| 8 | 1.88E-07             | 0.00                    |

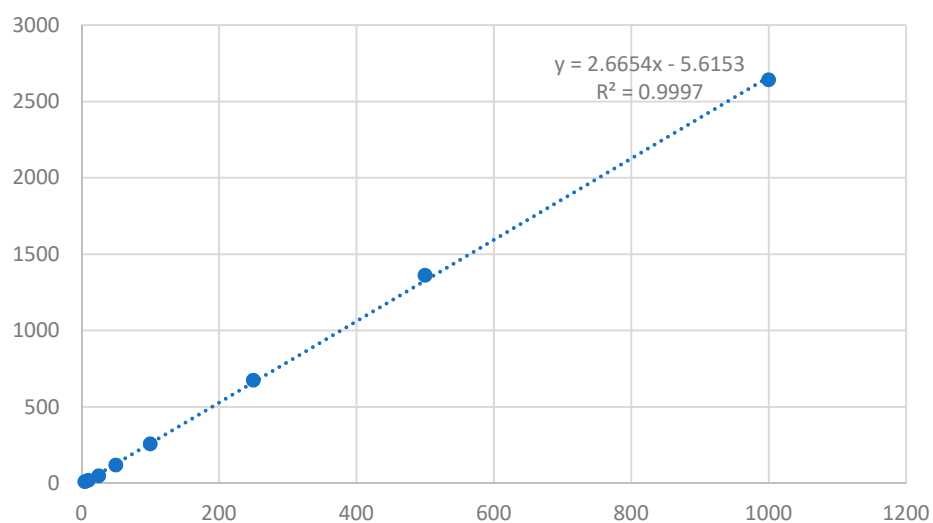

**Figure S12** - Calibration curve of FITC-PMOXA

**Table S2** - Calibration curve of FITC-PMOXA at 520nm

|   | Concentration<br>FITC-PMOXA<br>(µg/mL) | RFU<br>(520 nm) |
|---|----------------------------------------|-----------------|
| 1 | 1000                                   | 2640.9          |
| 2 | 500                                    | 1361            |
| 3 | 250                                    | 673.6           |
| 4 | 100                                    | 256.4           |
| 5 | 50                                     | 118.3           |
| 6 | 25                                     | 48.3            |
| 7 | 10                                     | 18.4            |
| 8 | 5                                      | 9.1             |

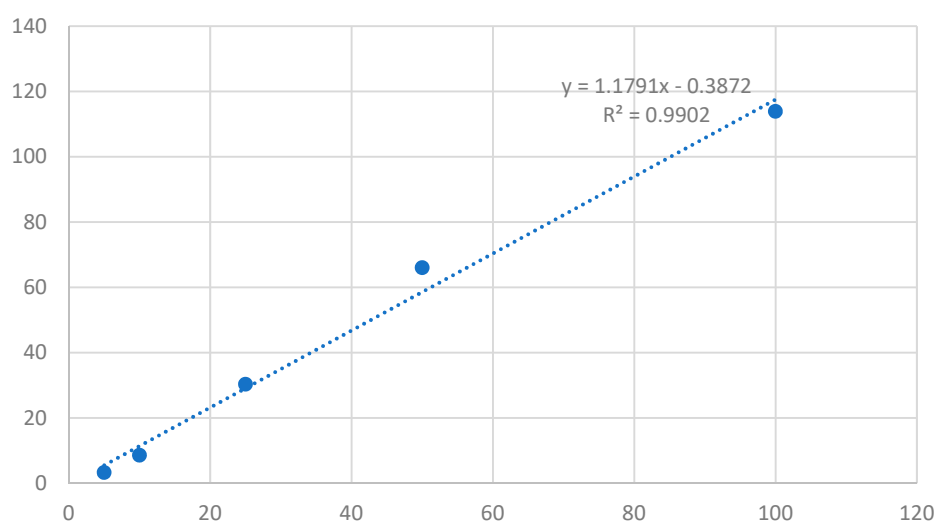

**Figure S13** - Calibration curve of FITC-CySPION

**Table S3** - FITC-CySPION at 520nm

|   | Concentration<br>FITC-CySPION<br>(µg/mL) | RFU<br>(520 nm) |
|---|------------------------------------------|-----------------|
| 1 | 100                                      | 113.9           |
| 2 | 50                                       | 66              |
| 3 | 25                                       | 30.3            |
| 4 | 10                                       | 8.6             |
| 5 | 5                                        | 3.3             |

**Table S4** - Permeability values for LY, FITC-PMOXA and FITC-CySPION

**Lucifer Yellow**

| Time (min) | Permeability (cm/s) |
|------------|---------------------|
| 30         | 1.38536E-06         |
| 60         | 1.65806E-06         |
| 90         | 2.048E-06           |

**FITC-PMOXA**

| Time (min) | Permeability (cm/s) | Standard deviation |
|------------|---------------------|--------------------|
| 30         | 1.25396E-06         | 6.88833E-07        |
| 60         | 2.4988E-06          | 4.56429E-07        |
| 90         | 1.66836E-06         | 3.23723E-07        |

**FITC-CySPION**

| Time (min) | Permeability (cm/s) | Standard deviation |
|------------|---------------------|--------------------|
| 30         | 3.77893E-06         | 8.27035E-07        |
| 60         | 3.06986E-06         | 7.23057E-07        |
| 90         | 2.27464E-06         | 2.62875E-07        |
